# Supplementary material for: Textile-Based Stretchable Microstrip Antenna with Intrinsic Strain Sensing
Source: PubMed Central journal article supplement (PMC8289303; doi:10.1021/acsaelm.1c00179), 2021-05-03
Supplement: el1c00179_si_001.pdf [file el1c00179_si_001.pdf]

## Supporting Information

# Textile based stretchable microstrip antenna with intrinsic strain sensing

*Fatemeh Nikbakhtnasrabadi, Hatem El Matbouly, Markellos Ntagios, Ravinder*

*Dahiya\**

Bendable Electronics and Sensing Technologies (BEST) Group,

University of Glasgow, G12 8QQ, UK.

Corresponding Author E-mail: [Ravinder.Dahiya@glasgow.ac.uk](mailto:Ravinder.Dahiya@glasgow.ac.uk)

The custom-made tensile setup shown in **Figure S1** was used to study the change in the electrical properties of the textile (i.e. resistance) upon uniaxial stretching. The setup consists of two holders controlled by a pair of stepper motors (Translation Stage VT-21L Micronix, US) with a velocity of movement of  $V_S = 0.1$  mm/s and a LabVIEW to stretch the samples homogeneously from both sides up to 100% strain. Two rectangular textile pieces were added to the design of the patch (shown as black bars in **Figure 6** inset) to make electrical connections. Electrical resistance was simultaneously collected using a digital multimeter (34461A, Agilent, US) connected to the samples.

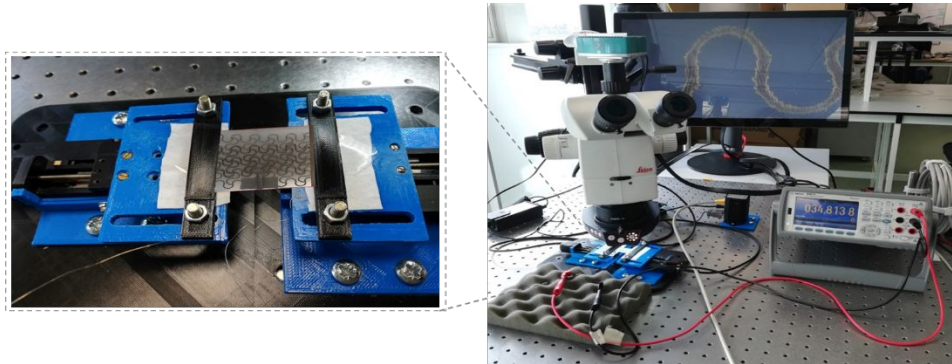

**Figure S1.** Custom-made setup to evaluate the electromechanical performance of meshed textile structure.
